# Supplementary material for: Synthesis of anthracene-bridged expanded rosarin
Source: Royal Society of Chemistry journal article supplement (doi:10.1039/d4ob01283f), 2024-01-01
Supplement: d4ob01283f1.pdf [file d4ob01283f1.pdf]

## Synthesis of Anthracene Bridged Expanded Rosarin

Bharti Yadav and Mangalampalli Ravikanth\*

Department of Chemistry, Indian Institute of Technology Bombay, Powai, Mumbai 400076,  
India, E-mail: [ravikanth@chem.iitb.ac.in](mailto:ravikanth@chem.iitb.ac.in)

| Sr. no. | Contents                                                                                                                                   | Page no. |
|---------|--------------------------------------------------------------------------------------------------------------------------------------------|----------|
| 1.      | General Experimental Section                                                                                                               | S2-S5    |
| 2.      | Figures S1-S10: HRMS, $^1\text{H}$ and $^{13}\text{C}\{^1\text{H}\}$ NMR, $^1\text{H}$ - $^1\text{H}$ COSY spectra of compounds 3, 4 and 5 | S6-S15   |
| 3.      | Figures S11: X-ray crystal structure of macrocycle 3.                                                                                      | S16      |
| 4.      | Table S1-S3 Crystal data of macrocycle 3.                                                                                                  | S17-S22  |
| 5.      | Figure S12-S13: DFT optimized structures of 3 and Cartesian coordinate for the optimized geometry of compound 3.                           | S23-S27  |
|         | References                                                                                                                                 | S29      |

## General Experimental Section

All the chemicals used for the synthesis were of reagent grade unless otherwise specified. Boron trifluoride diethyl etherate ( $\text{BF}_3 \cdot \text{OEt}_2$ ), trifluoroacetic acid (TFA), and 2,3-dichloro-5,6-dicyano-1,4-benzoquinone (DDQ) obtained from Sigma-Aldrich were used as such. All other chemicals used for the synthesis were of reagent grade unless otherwise specified. Solvents such as petroleum ether (60-80°C), ethyl acetate, and dichloromethane purchased from Merck, India, and were used without further purification. Column chromatography was performed on aluminium oxide active basic (70-200 mesh, pH value 8.5-10).  $^1\text{H}$  (1D and 2D) and  $^{13}\text{C}\{^1\text{H}\}$  NMR spectra were recorded on a Bruker 400 and 500 MHz FT-NMR spectrometers in  $\text{CDCl}_3$  using tetramethylsilane as the internal reference. The  $^{13}\text{C}\{^1\text{H}\}$  NMR frequencies are 125.77 and 100.06 MHz for 500 and 400 MHz instruments, respectively. Structural assignments were made with additional information from  $^1\text{H}$ - $^1\text{H}$  COSY and  $^1\text{H}$ - $^1\text{H}$  NOESY experiments. The high-resolution mass spectroscopy (HR-MS) were recorded with a Bruker maXis Impact and QT of micro mass spectrometer using positive mode ESI methods in acetonitrile or methanol. Matrix-assisted laser desorption ionization time-of-flight mass spectrometries (MALDI-TOF-MS) were recorded on a Bruker autoflex maX. UV-visible absorption spectra were recorded on a Cary Series UV-Vis-NIR and a UV 3600 Shimadzu spectrophotometer. Steady-state fluorescence spectra were obtained with Horiba FluoroMax 4 instruments. The stock solutions of the compounds ( $10^{-5}$  M) were prepared using HPLC-grade Toluene.

**Computational details:** All the calculations were carried out using Gaussian 09 program package.<sup>1</sup> The density functional theory (DFT)<sup>2</sup> method, hybrid functional B3LYP in conjunction with basis set 6-31G(d,p)<sup>3</sup> assisted in optimizing the structures of the compound **3** in ground ( $S_0$ ) states. For  $S_0 \rightarrow S_n$  transitions the oscillator strengths were derived using identical basis and functional hybrid set whereas the vertical excitation energies were obtained by the help of TD-DFT techniques. Under the Polarizable Continuum Model (PCM)<sup>4</sup> in the toluene

media all the computations were done using the Self-Consistent Reaction Field (SCRF). The electronic absorption spectra as well as the oscillator strengths were thoroughly examined using TD-DFT with PCM model on the basis of the optimized structures in the  $S_0$  state.

**X-ray Crystallography.** X-ray diffraction data were collected using a Bruker D8 QUEST single-crystal X-ray diffractometer with Mo  $K_\alpha$  radiation. The data collection was evaluated by using the Crystal Clear-SM Expert software. The data were collected by a standard  $\omega$ -scan technique. The structure was solved by a direct method using SHELXT-2018/2 and refined by full matrix least squares with SHELXL-2018/3 refining on  $F^2$ .<sup>5</sup> All data were corrected for Lorentz and polarization effects, and all non-hydrogen atoms were refined anisotropically. The remaining hydrogen atoms were placed in geometrically constrained positions and refined with isotropic temperature factors, generally 1.2Ueq of their parent atoms. Hydrogen atoms were included in the refinement process as per the riding model. CCDC 2374821 contained the supplementary crystallographic data for this paper. These data can be obtained free of charge from The Cambridge Crystallographic Data Centre via [www.ccdc.cam.ac.uk/data\\_request/cif](http://www.ccdc.cam.ac.uk/data_request/cif).

### **Experimental Section:**

The starting precursor 1,8-dibromoanthracene is commercially available compound. The compounds **3**, **4** and **5** were prepared as described below:

**Di-tert-butyl 2,2'-(anthracene-1,8-diyl)bis(1H-pyrrole-1-carboxylate) (4):** In round bottom flask, 1,8-dibromoanthracene (0.5 g, 1.48 mmol), (1-(tert-butoxycarbonyl)-1H-pyrrol-2-yl)boronic acid (1.26 g, 5.95 mmol) and tetrakis(triphenylphosphine)-palladium(0) (5 mol%) were dissolved in 1,4-dioxane (50 mL) and  $K_2CO_3$  (4 g, 2 M) was added and the reaction mixture was refluxed for 1 h at 105 °C, with vigorous stirring under nitrogen atmosphere. After completion of the reaction, as judged by TLC analysis, the reaction mixture was diluted with water and extracted with dichloromethane. The combined organic layers were washed with

water and dried over sodium sulphate. After evaporation, the crude product was purified by silica chromatography using a petroleum ether to afford di-tert-butyl 2,2'-(anthracene-1,8-diyl)bis(1H-pyrrole-1-carboxylate) **4** as a off-white solid (0.59 g, 78% yield); <sup>1</sup>H NMR (400 MHz, CDCl<sub>3</sub>) δ 8.46 (s, 1H), 8.01 (d, J = 8.4 Hz, 2H), 7.77 (s, 1H), 7.50-7.45 (m, 4H), 7.42 (d, J = 6.5 Hz, 2H), 6.39-6.37 (m, 2H), 6.27-6.25 (m, 2H), 0.78 (s, 18H). <sup>13</sup>C NMR (101 MHz, CDCl<sub>3</sub>) δ 148.9, 133.6, 132.0, 131.2, 127.9, 126.1, 124.9, 122.8, 122.0, 115.4, 110.7, 82.6, 27.0. HRMS (ESITOF) m/z [M + H]<sup>+</sup> calcd. for C<sub>32</sub>H<sub>33</sub>N<sub>2</sub>O<sub>4</sub> 509.2436, found 509.2436.

**1,8-Di(1H-pyrrol-2-yl)anthracene (5):** Compound **4** (0.5 g, 0.98 mmol) was dissolved in acetic acid (10 mL) and refluxed at 118 °C under stirring for 2 hours. The solution was cooled to room temperature and quenched with the addition of ice water (10 ml). The resulted precipitate was filtered and washed with water to afford compound **5** as green solid (0.3 g, 98% yield): <sup>1</sup>H NMR (400 MHz, Acetone-d<sub>6</sub>) δ 10.56 (s, 2H), 9.59 (s, 1H), 8.60 (s, 1H), 8.02 (dd, J = 8.5, 4.1 Hz, 2H), 7.54 (s, 2H), 7.53 (d, J = 1.6 Hz, 2H), 7.03 (td, J = 2.6, 1.6 Hz, 2H), 6.60 – 6.56 (m, 2H), 6.32 (dd, J = 5.8, 2.6 Hz, 2H).; <sup>13</sup>C NMR (101 MHz, Acetone-d<sub>6</sub>) δ 126.7, 125.6, 125.3, 124.8, 123.8, 118.7, 109.5, 108.8. MALDI-TOF mass (C<sub>22</sub>H<sub>16</sub>N<sub>2</sub>): 308.81 [M]<sup>+</sup>.

**Macrocycle 3:** Samples of compound **5** (100 mg, 0.324 mmol) and pentafluorobenzaldehyde (43.8 μL, 0.324 mmol) in 100 mL of CH<sub>2</sub>Cl<sub>2</sub> were stirred under N<sub>2</sub> atmosphere for 15 min. A catalytic amount of TFA (12.4 μL, 0.162 mmol) was added and reaction mixture was stirred for another 5 min. under N<sub>2</sub> atmosphere at room temperature. The oxidant, DDQ (74.02 mg, 0.324 mmol) was added to the reaction mixture and continued stirring for additional 10 min in open air. The crude compound was subjected to basic alumina column chromatography using petroleum ether/CH<sub>2</sub>Cl<sub>2</sub> (85:15) and afforded the desired compound **3** as a pink coloured solid in 3% yield (5.0 mg); <sup>1</sup>H NMR (400 MHz, CDCl<sub>3</sub>) δ 12.74 (s, 3H), 8.86 (s, 3H), 8.38 (s, 3H), 7.93 (d, J = 8.6 Hz, 6H), 7.64 (d, J = 6.1 Hz, 6H), 7.40 (dd, J = 8.5, 6.9 Hz, 6H), 6.66 (d, J = 4.2 Hz, 6H), 6.57 (d, J = 4.2 Hz, 6H). <sup>13</sup>C NMR (101 MHz, CDCl<sub>3</sub>) δ 155.4, 140.8, 132.5,

131.7, 129.7, 129.1, 127.0, 126.9, 126.0, 125.2, 123.8, 120.9. UV/Vis (Toluene):  $\lambda_{\text{max}}$ /nm (log  $\epsilon$ ): 522 (4.46). HRMS (ESI-TOF)  $m/z$   $[M + H]^+$  calcd for  $C_{87}H_{40}F_{15}N_6$  1453.3040, found 1453.3039.

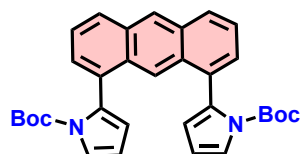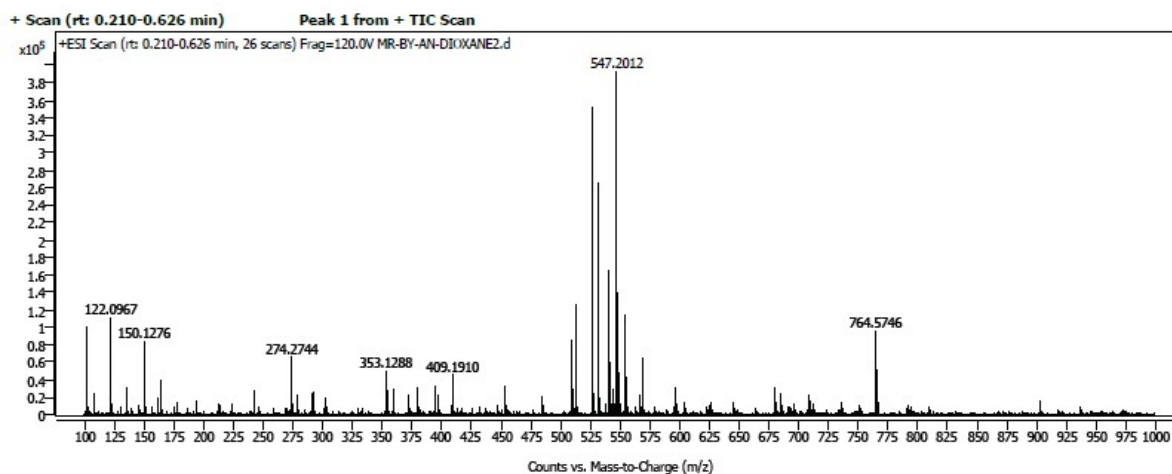

#### Compound Details

Cpd. 1: C<sub>32</sub>H<sub>32</sub>N<sub>2</sub>O<sub>4</sub>

| Formula                                                       | m/z      | Observed M/Z     | Difference Da     | Difference PPM    | Score |
|---------------------------------------------------------------|----------|------------------|-------------------|-------------------|-------|
| C <sub>32</sub> H <sub>32</sub> N <sub>2</sub> O <sub>4</sub> | 509.2436 | 509.243603604661 | 0.158922662251371 | 0.312694491062241 | 99.78 |

#### Compound Spectra (Zoomed)

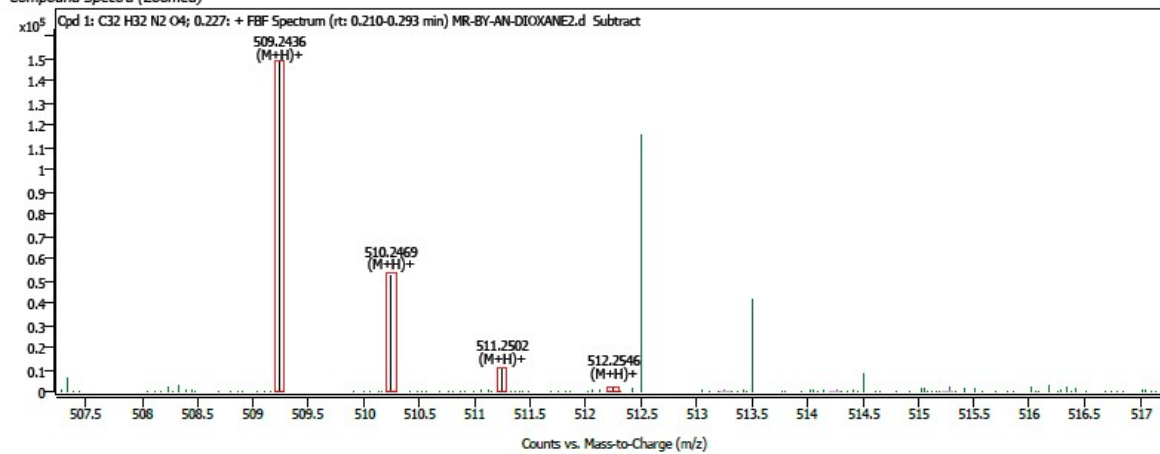

Fig. S1 HR-MS spectrum of the compound 4.

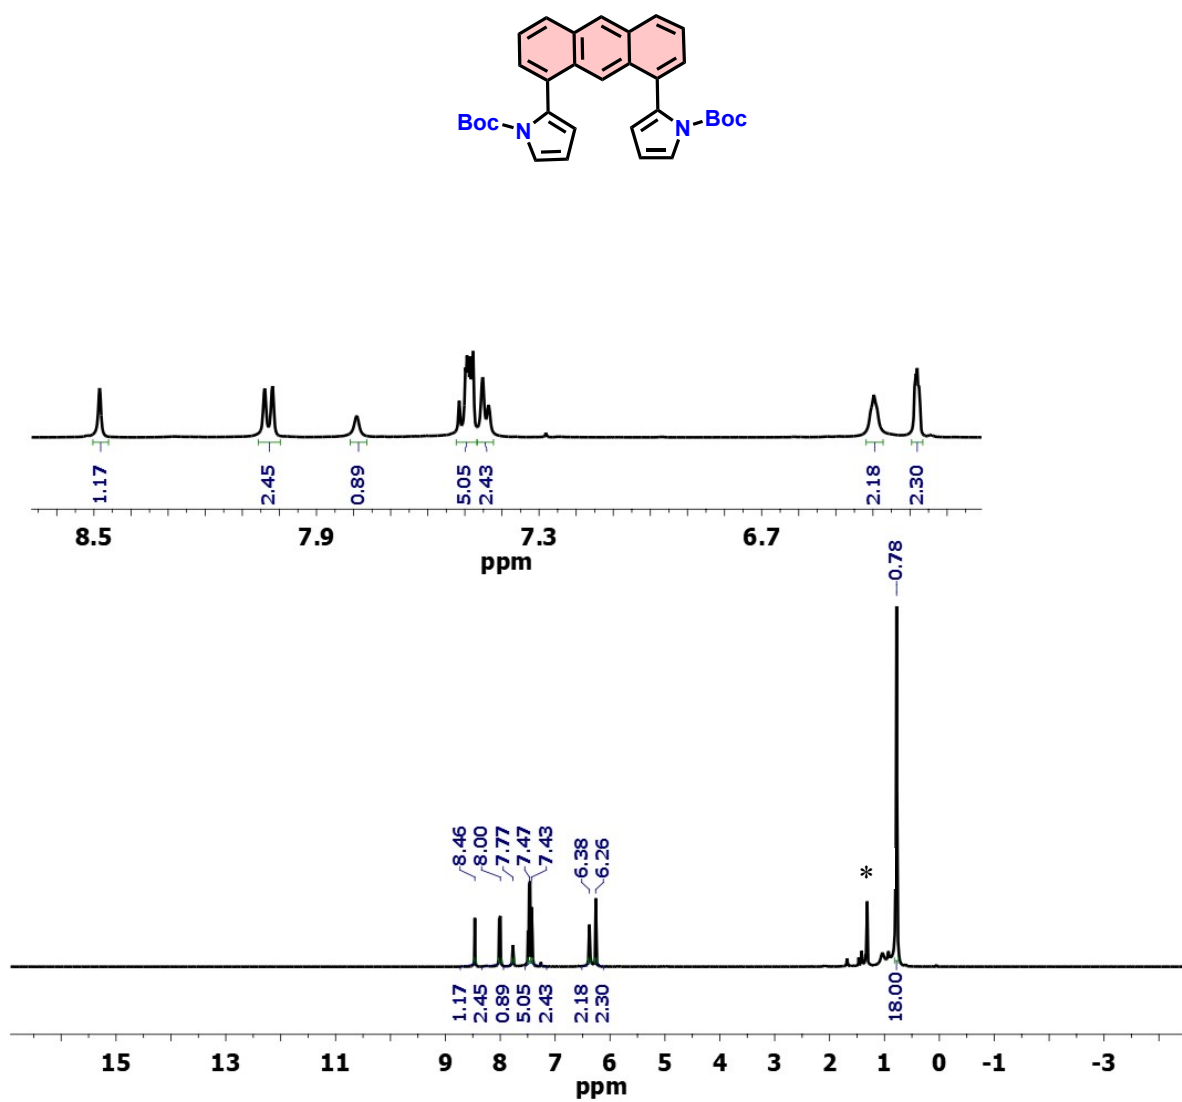

**Fig. S2** <sup>1</sup>H NMR spectrum of the compound 4 recorded in CDCl<sub>3</sub> on 400 MHz FT-NMR spectrometer. Note: Peaks marked with asterisk (\*) are due to residual solvents.

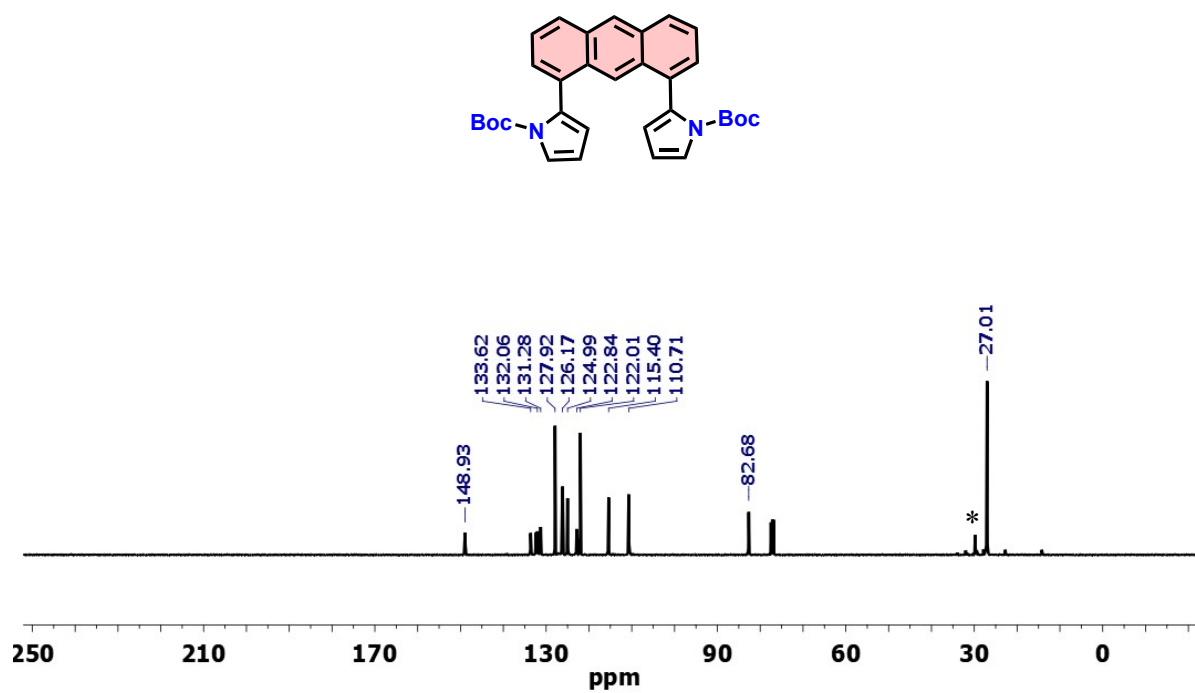

**Fig. S3** <sup>13</sup>C NMR spectrum of the compound 4 recorded in CDCl<sub>3</sub> on 400 MHz FT-NMR spectrometer. Note: Peaks marked with asterisk (\*) are due to residual solvents.



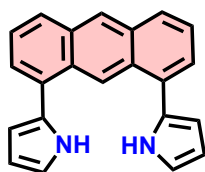

Sample name (file name prefix)

MR-BY-ACOH-210\_A18\1

Comment 1

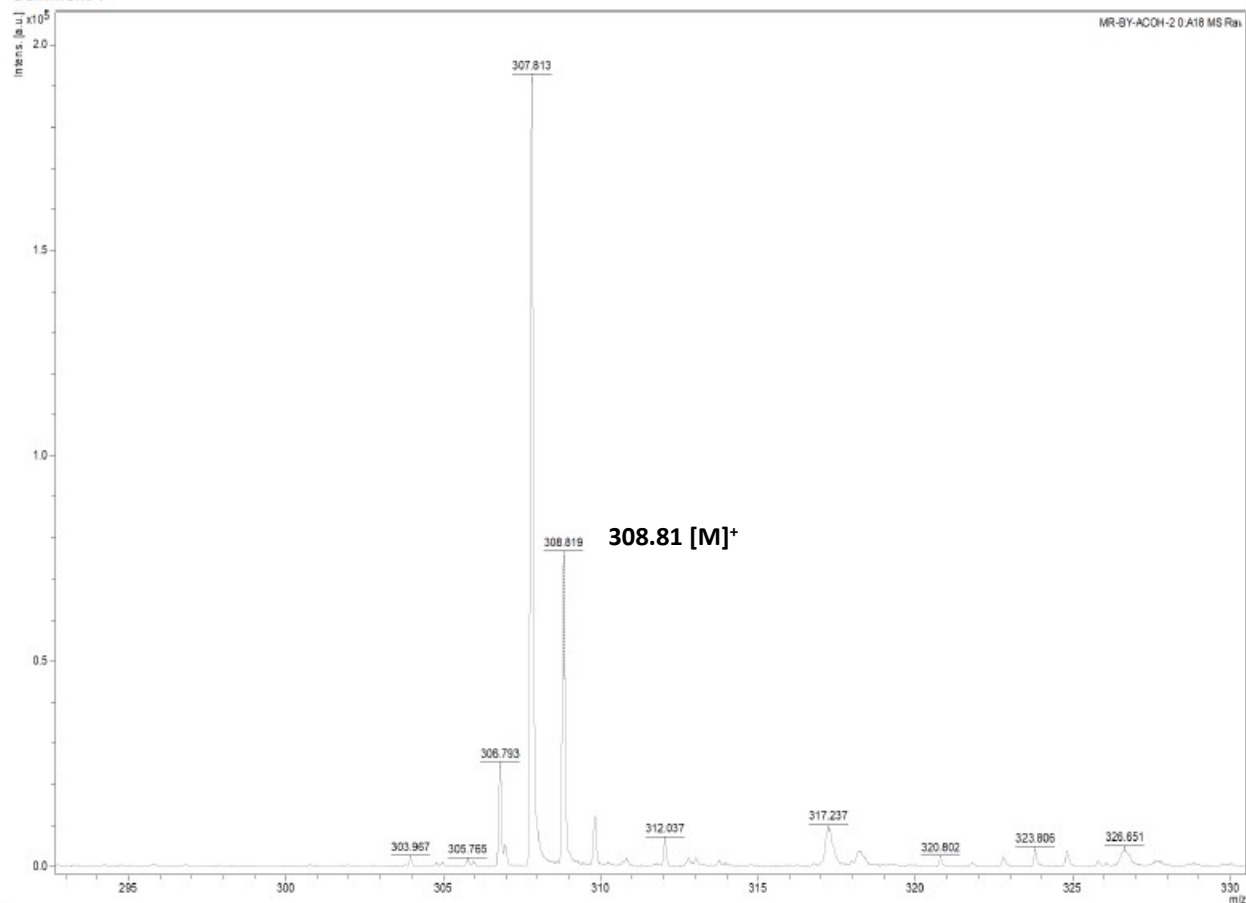

#### Acquisition Parameter

|                                 |                                                  |
|---------------------------------|--------------------------------------------------|
| Operator ID or name             | IIT-B                                            |
| Date of acquisition             | 2024-06-04T16:35:31.760+05:30                    |
| Path                            | D:\Data\Aug-23\JUN-24\MR-BY-ACOH-210_A18\1\1SRef |
| Acquisition method name         | D:\Methods\flexControlMethods\RP_700-3500_Da.par |
| Acquisition operation mode      | Reflector                                        |
| Voltage polarity                | POS                                              |
| Number of shots                 | 1000                                             |
| Calibration reference list used | PeptideCalibStandard mono                        |

Fig. S4 MALDI-TOF mass spectrum of the compound 5.

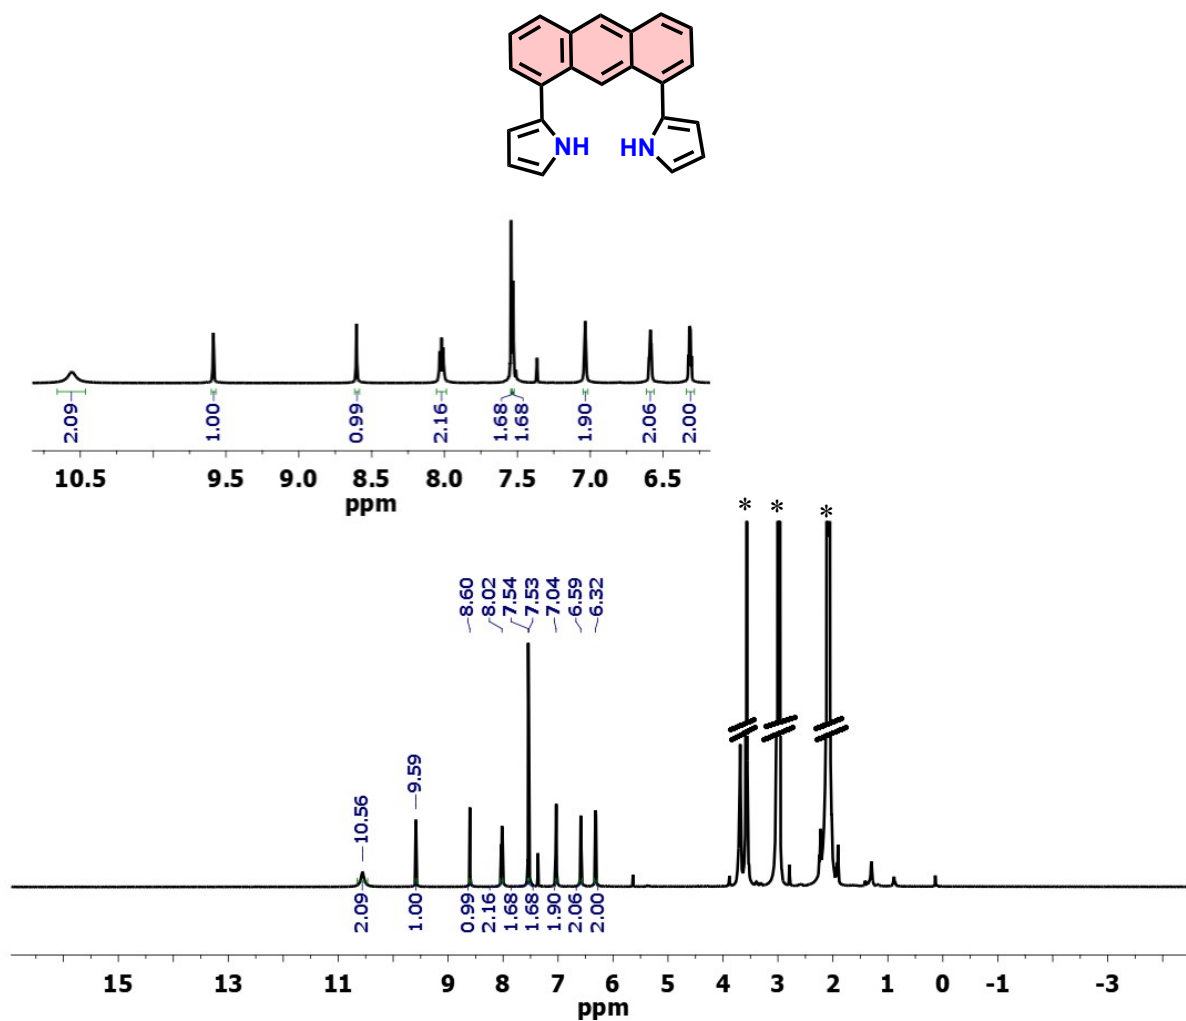

**Fig. S5**  $^1\text{H}$  NMR spectrum of the compound **5** recorded in  $\text{Acetone-d}_6$  on 400 MHz FT-NMR spectrometer. Peaks marked with asterisk (\*) are due to residual solvents

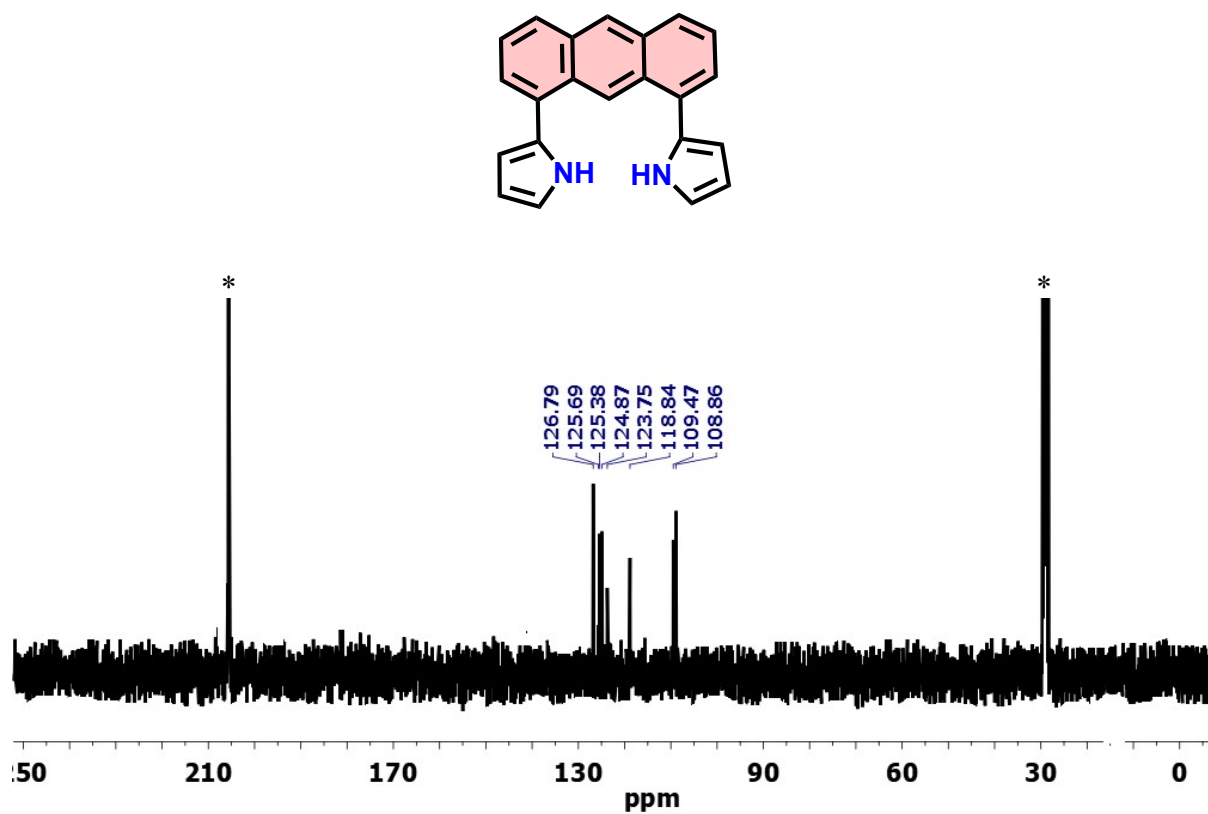

**Fig. S6** <sup>13</sup>C NMR spectrum of the compound **5** recorded in Acetone-d<sub>6</sub> on 400 MHz FT-NMR spectrometer. Peaks marked with asterisk (\*) are due to residual solvents

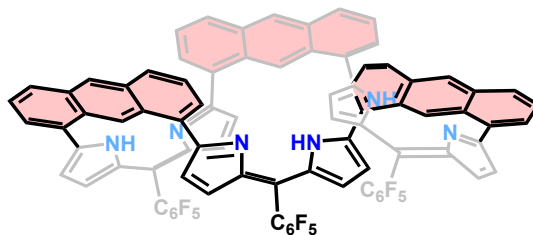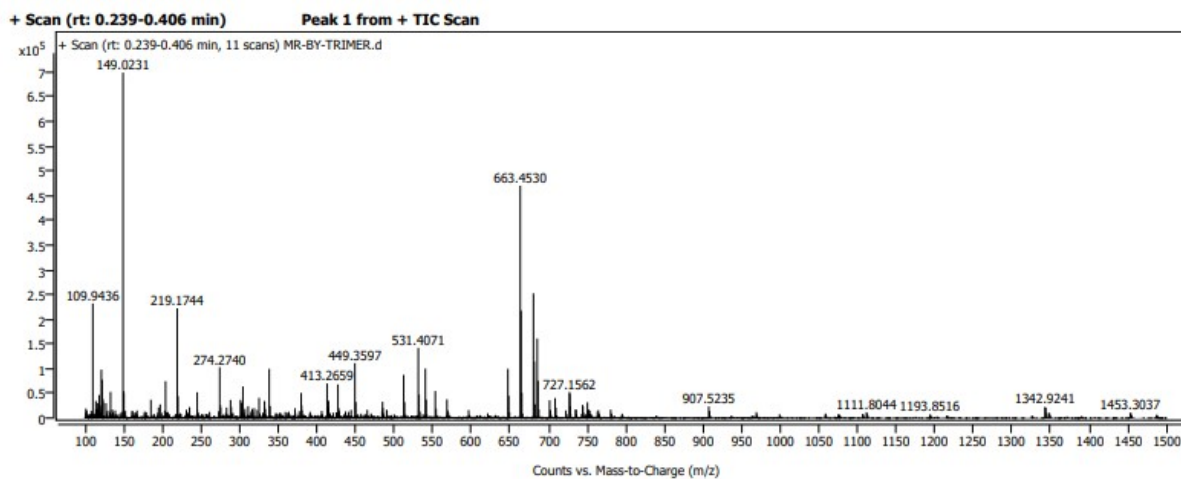

#### Compound Details

Cpd. 1: C87 H39 F15 N6

| Formula        | m/z       | Observed M/Z     | Difference Da     | Difference PPM    | Score |
|----------------|-----------|------------------|-------------------|-------------------|-------|
| C87 H39 F15 N6 | 1453.3040 | 1453.30397407243 | -2.92430235072061 | -2.01356676901733 | 96.04 |

#### Compound Spectra (Zoomed)

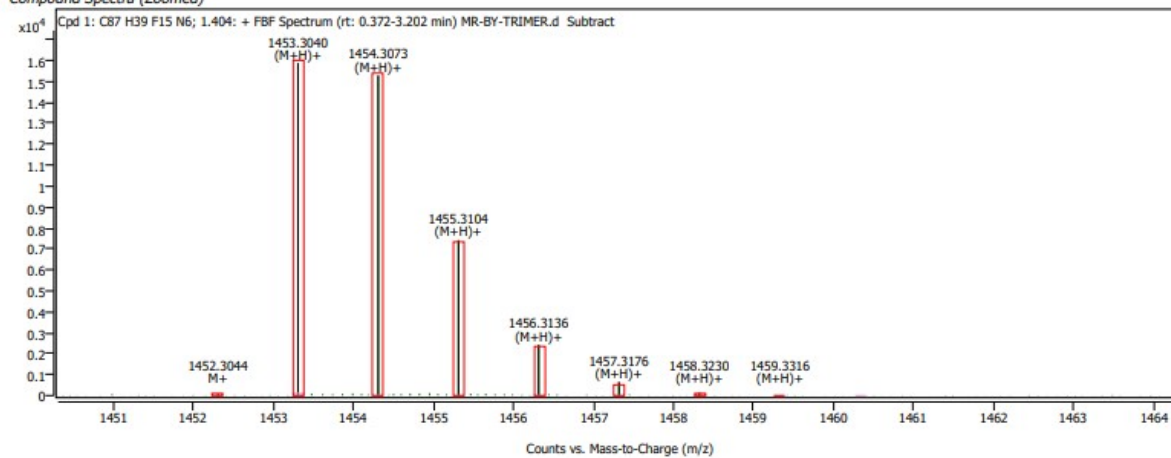

Fig. S7 HR-MS spectrum of the compound 3.

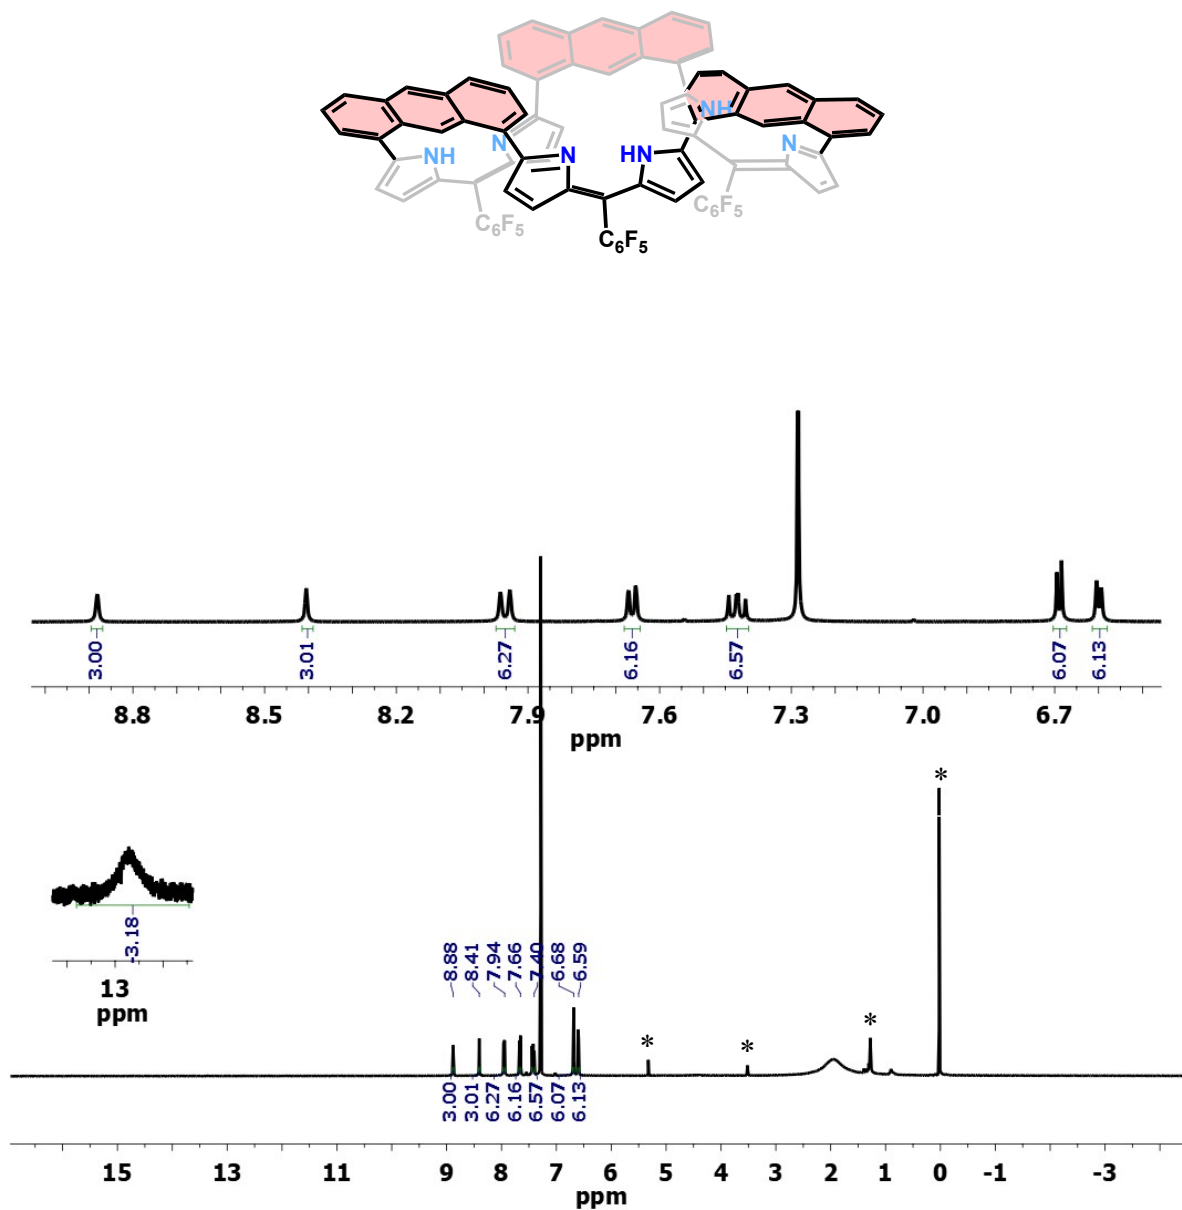

**Fig. S8**  $^1H$  NMR spectrum of the compound **3** recorded in  $CDCl_3$  on 400 MHz FT-NMR spectrometer. Peaks marked with asterisk (\*) are due to residual solvents such as Methanol and Dichloromethane.

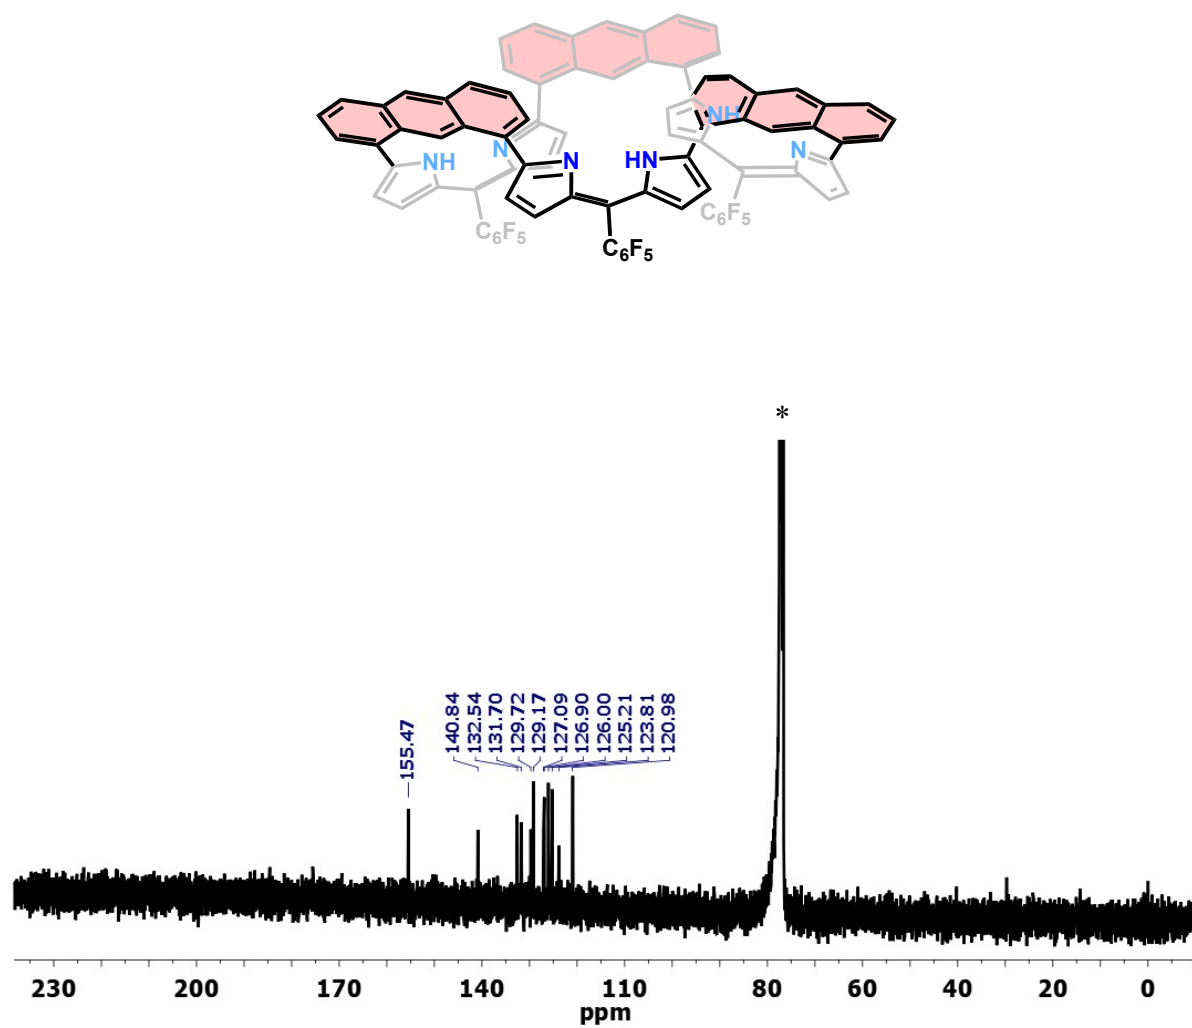

**Fig. S9** <sup>13</sup>C{<sup>1</sup>H} NMR spectrum of the compound 3 recorded in CDCl<sub>3</sub> on 400 MHz FT-NMR spectrometer. Peaks marked with asterisk (\*) are due to residual solvents

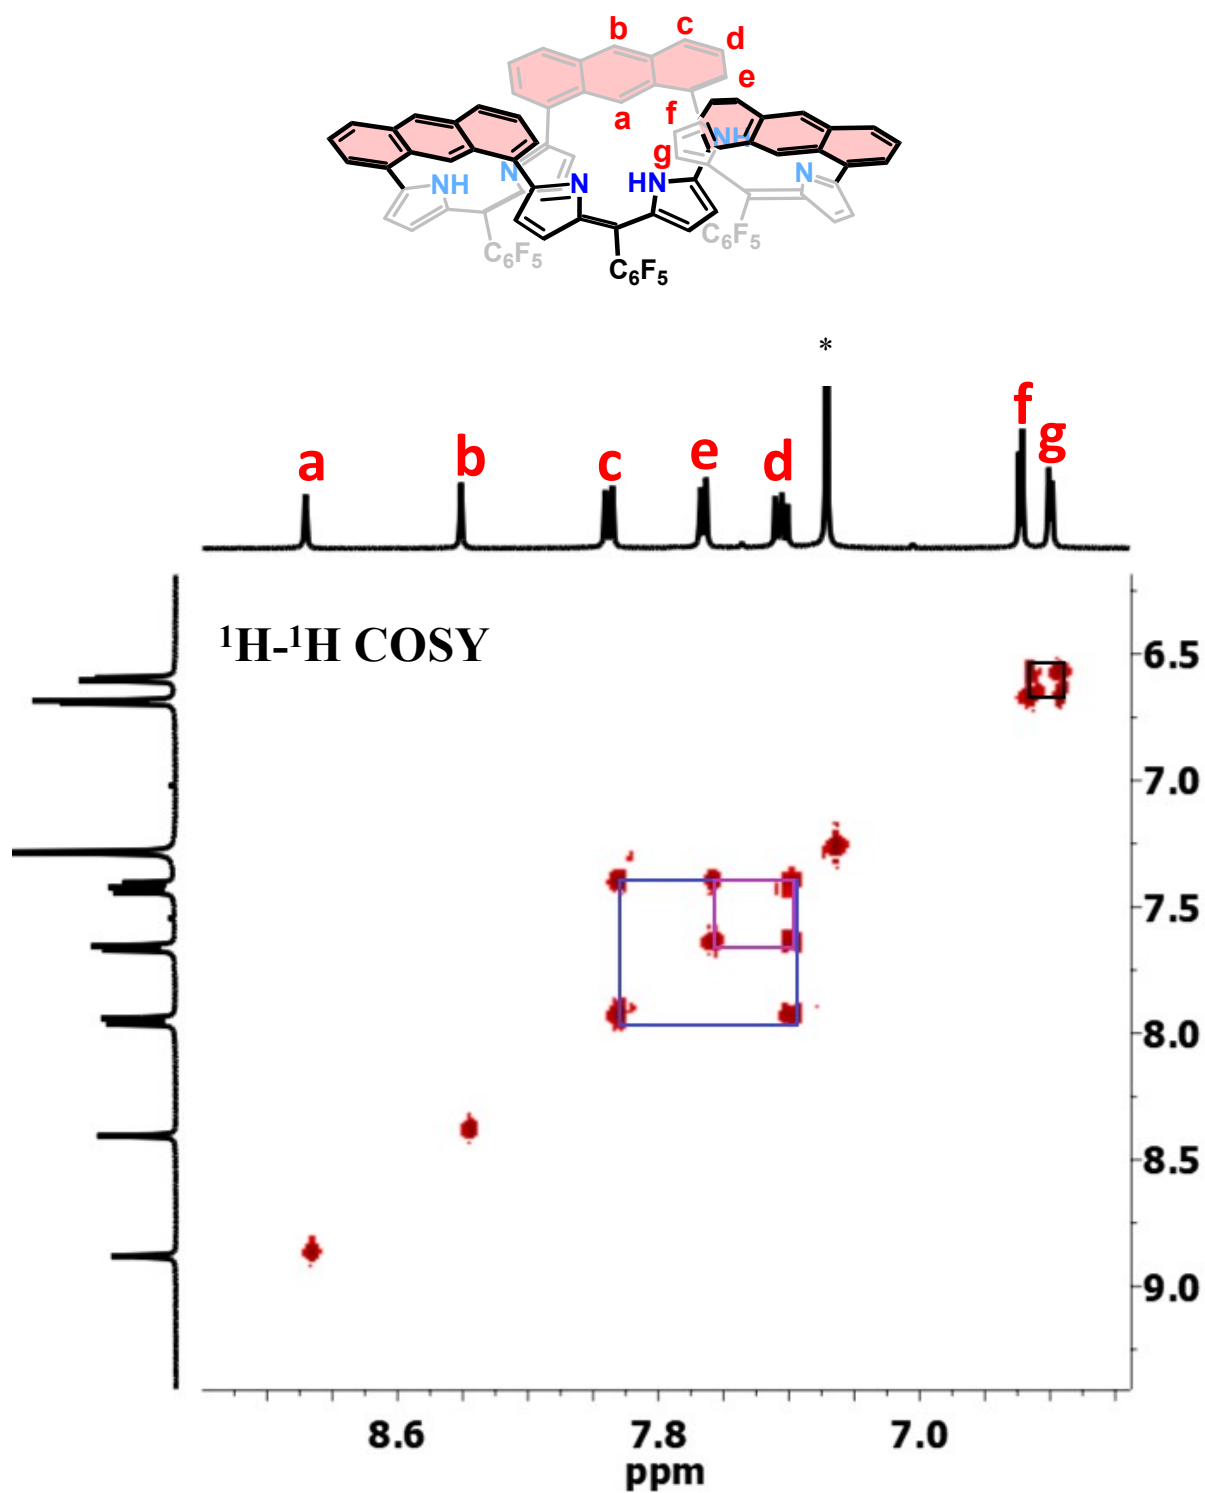

**Fig. S10** <sup>1</sup>H-<sup>1</sup>H COSY spectrum of the compound 3 recorded in CDCl<sub>3</sub> on 400 MHz NMR instrument. Note: Peaks marked with asterisk (\*) are due to residual solvents.

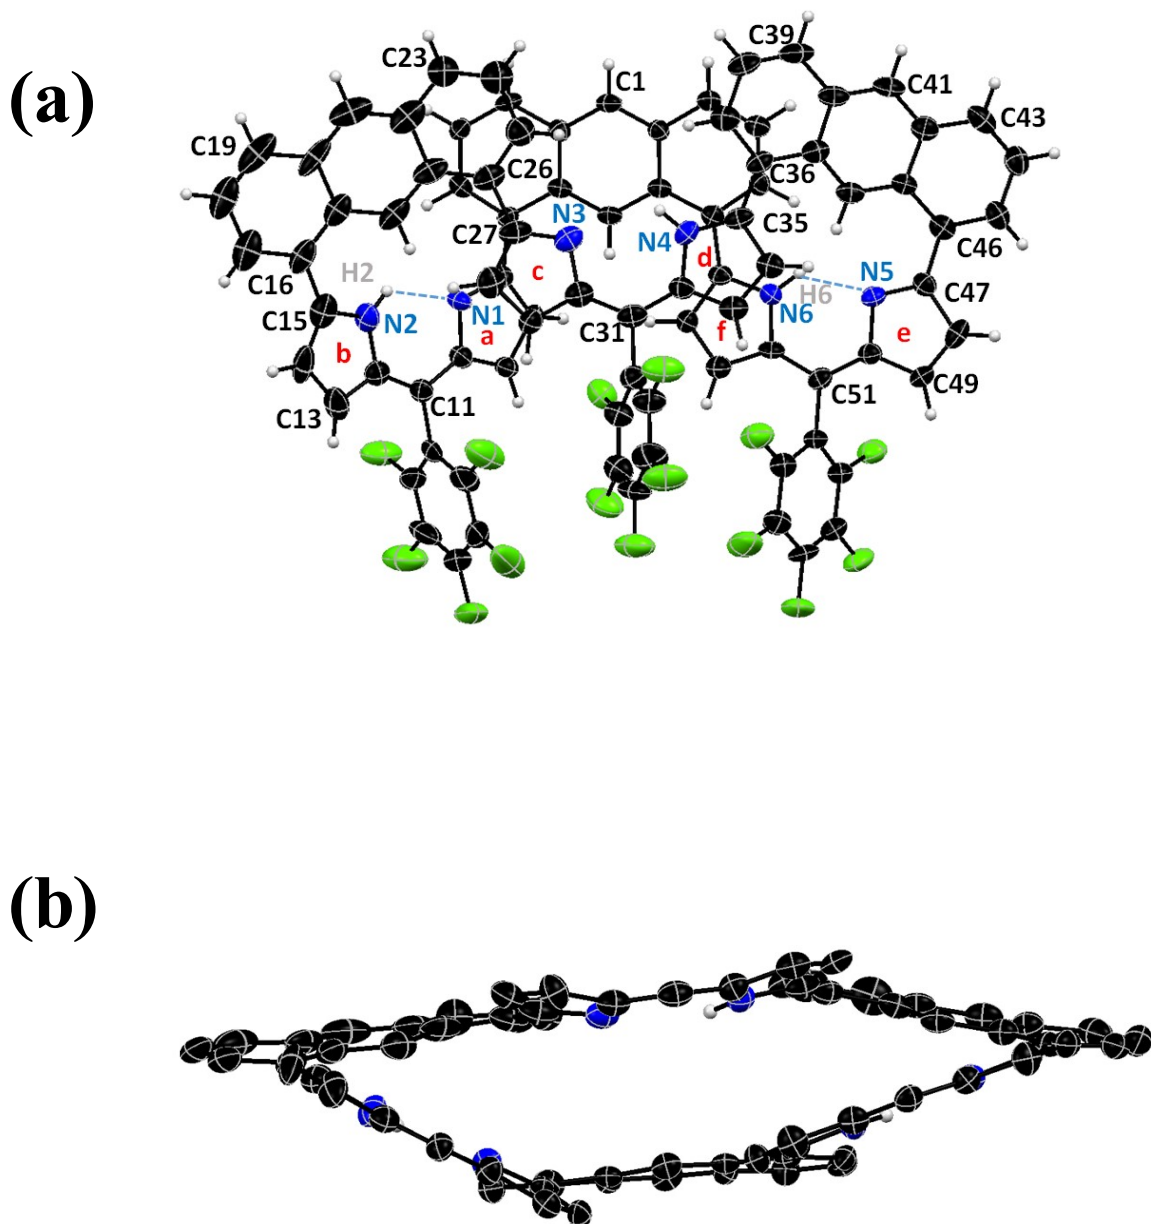

**Fig. S11** X-ray crystal structure of macrocycle **3** depicting (a) top and (b) side view (thermal ellipsoid (50% probability). Hydrogen atoms and *meso*-aryl groups have been omitted for clarity.



**Table S1.** Crystal data and structure refinement for Compound **3**.

| <b>Compound</b>                        | <b>3</b>                                                                       |
|----------------------------------------|--------------------------------------------------------------------------------|
| Empirical Formula                      | C <sub>88</sub> H <sub>40</sub> Cl <sub>3</sub> F <sub>15</sub> N <sub>6</sub> |
| Crystal System                         | monoclinic                                                                     |
| Space Group                            | P2 <sub>1</sub> /n                                                             |
| R <sub>1</sub> (I > 2.00σ(I))          | 0.0960                                                                         |
| wR <sub>2</sub> (All reflections)      | 0.3151                                                                         |
| GOF                                    | 1.096                                                                          |
| a [Å]                                  | 19.563 (3)                                                                     |
| b [Å]                                  | 17.740(3)                                                                      |
| c [Å]                                  | 21.900(4)                                                                      |
| α [°]                                  | 90                                                                             |
| β [°]                                  | 97.679(3)                                                                      |
| γ [°]                                  | 90                                                                             |
| V [Å <sup>3</sup> ]                    | 7533(2)                                                                        |
| Z                                      | 4                                                                              |
| T [K]                                  | 105.00                                                                         |
| δ <sub>calc</sub> [g/cm <sup>3</sup> ] | 1.387                                                                          |
| F <sub>000</sub>                       | 3188.2                                                                         |
| 2θmax [°]                              | 3.76 to 50.14                                                                  |
| no. reflns measd. (unique)             | 122303                                                                         |
| no. params.                            | 1012                                                                           |
| CCDC no.                               | 2374821                                                                        |

**Table S2.** Bond lengths for the macrocycle **3**.

| Atom | Atom | Length/Å  | Atom | Atom | Length/Å  |
|------|------|-----------|------|------|-----------|
| C11  | C88  | 1.745(9)  | C28  | C29  | 1.402(11) |
| C12  | C88  | 1.749(9)  | C29  | C30  | 1.405(10) |
| C13  | C88  | 1.699(9)  | C30  | C31  | 1.389(10) |
| F1   | C71  | 1.353(9)  | C31  | C32  | 1.382(10) |
| F2   | C72  | 1.338(11) | C31  | C76  | 1.494(10) |
| F3   | C73  | 1.348(10) | C32  | C33  | 1.412(10) |
| F4   | C74  | 1.349(11) | C33  | C34  | 1.364(10) |
| F5   | C75  | 1.339(11) | C34  | C35  | 1.431(10) |
| F6   | C77  | 1.349(9)  | C35  | C36  | 1.471(10) |
| F7   | C78  | 1.341(9)  | C36  | C37  | 1.384(10) |
| F8   | C79  | 1.372(9)  | C36  | C67  | 1.446(10) |
| F9   | C80  | 1.363(9)  | C37  | C38  | 1.419(10) |
| F10  | C81  | 1.353(9)  | C38  | C39  | 1.347(11) |
| F11  | C83  | 1.334(9)  | C39  | C40  | 1.407(11) |
| F12  | C84  | 1.375(10) | C40  | C41  | 1.413(11) |
| F13  | C85  | 1.349(9)  | C40  | C67  | 1.440(9)  |
| F14  | C86  | 1.334(9)  | C41  | C42  | 1.382(10) |
| F15  | C87  | 1.345(8)  | C42  | C43  | 1.414(11) |
| N1   | C7   | 1.378(8)  | C42  | C69  | 1.454(10) |
| N1   | C10  | 1.400(8)  | C43  | C44  | 1.348(11) |
| N2   | C12  | 1.371(9)  | C44  | C45  | 1.426(10) |
| N2   | C15  | 1.322(9)  | C45  | C46  | 1.388(10) |
| N3   | C27  | 1.343(10) | C46  | C47  | 1.461(10) |
| N3   | C30  | 1.392(9)  | C46  | C69  | 1.445(10) |
| N4   | C32  | 1.391(8)  | C47  | C48  | 1.466(10) |
| N4   | C35  | 1.347(9)  | C48  | C49  | 1.359(10) |
| N5   | C47  | 1.324(9)  | C49  | C50  | 1.431(10) |
| N5   | C50  | 1.401(8)  | C50  | C51  | 1.395(10) |
| N6   | C52  | 1.366(8)  | C51  | C52  | 1.426(9)  |
| N6   | C55  | 1.360(8)  | C51  | C82  | 1.481(9)  |
| C1   | C2   | 1.393(10) | C52  | C53  | 1.402(10) |
| C1   | C60  | 1.396(10) | C53  | C54  | 1.383(9)  |
| C2   | C3   | 1.416(9)  | C54  | C55  | 1.411(9)  |
| C2   | C61  | 1.437(9)  | C55  | C56  | 1.479(9)  |
| C3   | C4   | 1.360(10) | C56  | C57  | 1.377(9)  |
| C4   | C5   | 1.400(9)  | C56  | C63  | 1.460(9)  |
| C5   | C6   | 1.359(9)  | C57  | C58  | 1.415(9)  |
| C6   | C7   | 1.465(9)  | C58  | C59  | 1.336(9)  |
| C6   | C61  | 1.454(9)  | C59  | C60  | 1.412(10) |
| C7   | C8   | 1.382(9)  | C60  | C63  | 1.445(9)  |
| C8   | C9   | 1.409(9)  | C61  | C62  | 1.387(9)  |
| C9   | C10  | 1.389(10) | C62  | C63  | 1.402(9)  |
| C10  | C11  | 1.413(10) | C64  | C65  | 1.372(11) |
| C11  | C12  | 1.379(10) | C65  | C66  | 1.386(11) |
| C11  | C70  | 1.496(10) | C67  | C68  | 1.383(9)  |
| C12  | C13  | 1.441(10) | C68  | C69  | 1.396(10) |

|             |             |                 |             |             |                 |
|-------------|-------------|-----------------|-------------|-------------|-----------------|
| C13         | C14         | 1.373(12)       | C70         | C71         | 1.370(11)       |
| C14         | C15         | 1.435(11)       | C70         | C75         | 1.380(11)       |
| <b>Atom</b> | <b>Atom</b> | <b>Length/Å</b> | <b>Atom</b> | <b>Atom</b> | <b>Length/Å</b> |
| C15         | C16         | 1.483(12)       | C71         | C72         | 1.397(11)       |
| C16         | C17         | 1.389(11)       | C72         | C73         | 1.374(14)       |
| C16         | C64         | 1.427(12)       | C73         | C74         | 1.370(15)       |
| C17         | C18         | 1.445(13)       | C74         | C75         | 1.380(13)       |
| C18         | C19         | 1.367(13)       | C76         | C77         | 1.391(10)       |
| C19         | C20         | 1.411(13)       | C76         | C81         | 1.386(10)       |
| C20         | C21         | 1.426(13)       | C77         | C78         | 1.374(11)       |
| C20         | C64         | 1.421(11)       | C78         | C79         | 1.351(12)       |
| C21         | C22         | 1.388(13)       | C79         | C80         | 1.356(12)       |
| C22         | C23         | 1.415(13)       | C80         | C81         | 1.365(11)       |
| C22         | C66         | 1.434(11)       | C82         | C83         | 1.390(11)       |
| C23         | C24         | 1.333(13)       | C82         | C87         | 1.391(10)       |
| C24         | C25         | 1.424(12)       | C83         | C84         | 1.387(11)       |
| C25         | C26         | 1.363(11)       | C84         | C85         | 1.328(12)       |
| C26         | C27         | 1.480(11)       | C85         | C86         | 1.362(12)       |
| C26         | C66         | 1.447(12)       | C86         | C87         | 1.391(10)       |
| C27         | C28         | 1.454(11)       |             |             |                 |

**Table S3.** Bond angles for the macrocycle **3**.

| Atom | Atom | Atom | Angle/°  | Atom | Atom | Atom | Angle/°  |
|------|------|------|----------|------|------|------|----------|
| C12  | C88  | C11  | 110.8(5) | C50  | C49  | C48  | 106.7(7) |
| C13  | C88  | C11  | 112.1(5) | C49  | C50  | N5   | 109.9(6) |
| C13  | C88  | C12  | 110.7(5) | C51  | C50  | N5   | 120.1(6) |
| C10  | N1   | C7   | 109.4(6) | C51  | C50  | C49  | 130.0(7) |
| C15  | N2   | C12  | 109.6(7) | C52  | C51  | C50  | 123.3(6) |
| C30  | N3   | C27  | 107.4(7) | C82  | C51  | C50  | 120.4(6) |
| C35  | N4   | C32  | 109.1(6) | C82  | C51  | C52  | 116.3(6) |
| C50  | N5   | C47  | 106.2(6) | C51  | C52  | N6   | 122.0(6) |
| C55  | N6   | C52  | 112.3(6) | C53  | C52  | N6   | 105.9(6) |
| C60  | C1   | C2   | 123.6(7) | C53  | C52  | C51  | 132.0(7) |
| C3   | C2   | C1   | 122.1(7) | C54  | C53  | C52  | 107.9(7) |
| C61  | C2   | C1   | 117.4(7) | C55  | C54  | C53  | 108.6(7) |
| C61  | C2   | C3   | 120.5(7) | C54  | C55  | N6   | 105.2(6) |
| C4   | C3   | C2   | 120.8(7) | C56  | C55  | N6   | 119.0(6) |
| C5   | C4   | C3   | 118.9(7) | C56  | C55  | C54  | 135.7(7) |
| C6   | C5   | C4   | 123.8(7) | C57  | C56  | C55  | 117.9(6) |
| C7   | C6   | C5   | 119.2(6) | C63  | C56  | C55  | 124.0(6) |
| C61  | C6   | C5   | 118.9(6) | C63  | C56  | C57  | 118.1(6) |
| C61  | C6   | C7   | 121.8(6) | C58  | C57  | C56  | 123.5(7) |
| C6   | C7   | N1   | 118.0(6) | C59  | C58  | C57  | 118.9(7) |
| C8   | C7   | N1   | 107.6(6) | C60  | C59  | C58  | 122.2(7) |
| C8   | C7   | C6   | 134.3(7) | C59  | C60  | C1   | 121.8(7) |
| C9   | C8   | C7   | 108.3(6) | C63  | C60  | C1   | 118.2(6) |
| C10  | C9   | C8   | 107.8(6) | C63  | C60  | C59  | 120.0(7) |
| C9   | C10  | N1   | 106.9(6) | C6   | C61  | C2   | 116.8(6) |
| C11  | C10  | N1   | 119.8(7) | C62  | C61  | C2   | 120.0(6) |
| C11  | C10  | C9   | 133.3(7) | C62  | C61  | C6   | 123.2(6) |
| C12  | C11  | C10  | 125.1(7) | C63  | C62  | C61  | 122.1(6) |
| C70  | C11  | C10  | 114.4(7) | C60  | C63  | C56  | 117.3(6) |
| C70  | C11  | C12  | 120.5(6) | C62  | C63  | C56  | 124.3(6) |
| C11  | C12  | N2   | 121.3(7) | C62  | C63  | C60  | 118.4(6) |
| C13  | C12  | N2   | 108.9(7) | C20  | C64  | C16  | 118.9(9) |
| C13  | C12  | C11  | 129.7(8) | C65  | C64  | C16  | 123.0(8) |
| C14  | C13  | C12  | 104.6(8) | C65  | C64  | C20  | 118.0(9) |
| C15  | C14  | C13  | 108.9(8) | C66  | C65  | C64  | 124.8(8) |
| C14  | C15  | N2   | 108.0(8) | C26  | C66  | C22  | 118.3(9) |
| C16  | C15  | N2   | 122.5(8) | C65  | C66  | C22  | 117.8(9) |
| C16  | C15  | C14  | 129.5(8) | C65  | C66  | C26  | 123.8(7) |

|             |             |             |                |             |             |             |                |
|-------------|-------------|-------------|----------------|-------------|-------------|-------------|----------------|
| C17         | C16         | C15         | 117.0(9)       | C40         | C67         | C36         | 118.9(7)       |
| C64         | C16         | C15         | 122.2(8)       | C68         | C67         | C36         | 121.6(7)       |
| <b>Atom</b> | <b>Atom</b> | <b>Atom</b> | <b>Angle/°</b> | <b>Atom</b> | <b>Atom</b> | <b>Atom</b> | <b>Angle/°</b> |
| C64         | C16         | C17         | 120.8(9)       | C68         | C67         | C40         | 119.4(7)       |
| C18         | C17         | C16         | 119.6(10)      | C69         | C68         | C67         | 123.5(7)       |
| C19         | C18         | C17         | 119.0(10)      | C46         | C69         | C42         | 118.8(7)       |
| C20         | C19         | C18         | 122.5(10)      | C68         | C69         | C42         | 117.5(7)       |
| C21         | C20         | C19         | 123.1(10)      | C68         | C69         | C46         | 123.6(7)       |
| C64         | C20         | C19         | 119.0(10)      | C71         | C70         | C11         | 120.3(7)       |
| C64         | C20         | C21         | 117.9(9)       | C75         | C70         | C11         | 122.2(8)       |
| C22         | C21         | C20         | 122.8(9)       | C75         | C70         | C71         | 117.2(8)       |
| C23         | C22         | C21         | 120.7(10)      | C70         | C71         | F1          | 121.3(7)       |
| C66         | C22         | C21         | 118.0(10)      | C72         | C71         | F1          | 116.2(9)       |
| C66         | C22         | C23         | 121.3(10)      | C72         | C71         | C70         | 122.5(9)       |
| C24         | C23         | C22         | 117.9(10)      | C71         | C72         | F2          | 120.6(10)      |
| C25         | C24         | C23         | 122.9(11)      | C73         | C72         | F2          | 120.7(10)      |
| C26         | C25         | C24         | 121.3(10)      | C73         | C72         | C71         | 118.7(10)      |
| C27         | C26         | C25         | 120.1(9)       | C72         | C73         | F3          | 119.2(12)      |
| C66         | C26         | C25         | 118.0(8)       | C74         | C73         | F3          | 121.0(11)      |
| C66         | C26         | C27         | 121.8(8)       | C74         | C73         | C72         | 119.7(9)       |
| C26         | C27         | N3          | 122.8(8)       | C73         | C74         | F4          | 119.6(11)      |
| C28         | C27         | N3          | 110.9(7)       | C75         | C74         | F4          | 120.0(12)      |
| C28         | C27         | C26         | 126.2(9)       | C75         | C74         | C73         | 120.4(10)      |
| C29         | C28         | C27         | 104.1(8)       | C70         | C75         | F5          | 119.2(8)       |
| C30         | C29         | C28         | 108.5(8)       | C74         | C75         | F5          | 119.4(9)       |
| C29         | C30         | N3          | 109.0(7)       | C74         | C75         | C70         | 121.4(10)      |
| C31         | C30         | N3          | 124.0(7)       | C77         | C76         | C31         | 122.7(7)       |
| C31         | C30         | C29         | 126.2(7)       | C81         | C76         | C31         | 122.8(7)       |
| C32         | C31         | C30         | 127.5(7)       | C81         | C76         | C77         | 114.5(7)       |
| C76         | C31         | C30         | 114.5(7)       | C76         | C77         | F6          | 118.8(7)       |
| C76         | C31         | C32         | 117.9(7)       | C78         | C77         | F6          | 117.5(7)       |
| C31         | C32         | N4          | 124.4(7)       | C78         | C77         | C76         | 123.7(8)       |
| C33         | C32         | N4          | 106.5(7)       | C77         | C78         | F7          | 120.7(8)       |
| C33         | C32         | C31         | 129.0(7)       | C79         | C78         | F7          | 120.9(8)       |
| C34         | C33         | C32         | 109.4(7)       | C79         | C78         | C77         | 118.4(8)       |
| C35         | C34         | C33         | 106.0(7)       | C78         | C79         | F8          | 120.2(8)       |
| C34         | C35         | N4          | 108.9(6)       | C80         | C79         | F8          | 118.9(9)       |
| C36         | C35         | N4          | 123.7(7)       | C80         | C79         | C78         | 120.9(8)       |
| C36         | C35         | C34         | 127.4(7)       | C79         | C80         | F9          | 120.6(8)       |
| C37         | C36         | C35         | 119.1(7)       | C81         | C80         | F9          | 119.5(8)       |
| C67         | C36         | C35         | 122.1(6)       | C81         | C80         | C79         | 119.9(8)       |
| C67         | C36         | C37         | 118.7(7)       | C76         | C81         | F10         | 119.2(7)       |
| C38         | C37         | C36         | 121.0(8)       | C80         | C81         | F10         | 118.1(7)       |
| C39         | C38         | C37         | 120.7(8)       | C80         | C81         | C76         | 122.7(8)       |
| C40         | C39         | C38         | 121.7(8)       | C83         | C82         | C51         | 122.1(7)       |
| C41         | C40         | C39         | 124.1(7)       | C87         | C82         | C51         | 122.4(7)       |

|             |             |             |                |             |             |             |                |
|-------------|-------------|-------------|----------------|-------------|-------------|-------------|----------------|
| C67         | C40         | C39         | 118.8(8)       | C87         | C82         | C83         | 115.3(7)       |
| C67         | C40         | C41         | 117.0(7)       | C82         | C83         | F11         | 119.4(7)       |
| <b>Atom</b> | <b>Atom</b> | <b>Atom</b> | <b>Angle/°</b> | <b>Atom</b> | <b>Atom</b> | <b>Atom</b> | <b>Angle/°</b> |
| C42         | C41         | C40         | 123.7(7)       | C84         | C83         | F11         | 119.6(8)       |
| C43         | C42         | C41         | 123.4(8)       | C84         | C83         | C82         | 121.0(8)       |
| C69         | C42         | C41         | 118.5(7)       | C83         | C84         | F12         | 117.0(9)       |
| C69         | C42         | C43         | 118.1(7)       | C85         | C84         | F12         | 121.1(8)       |
| C44         | C43         | C42         | 123.2(8)       | C85         | C84         | C83         | 121.8(9)       |
| C45         | C44         | C43         | 119.0(8)       | C84         | C85         | F13         | 121.2(9)       |
| C46         | C45         | C44         | 122.0(8)       | C86         | C85         | F13         | 118.8(9)       |
| C47         | C46         | C45         | 118.4(7)       | C86         | C85         | C84         | 119.9(8)       |
| C69         | C46         | C45         | 118.7(7)       | C85         | C86         | F14         | 120.8(8)       |
| C69         | C46         | C47         | 122.9(7)       | C87         | C86         | F14         | 120.2(8)       |
| C46         | C47         | N5          | 121.0(7)       | C87         | C86         | C85         | 118.9(8)       |
| C48         | C47         | N5          | 110.9(7)       | C82         | C87         | F15         | 120.3(7)       |
| C48         | C47         | C46         | 128.1(7)       | C86         | C87         | F15         | 116.8(7)       |
| C49         | C48         | C47         | 106.2(7)       | C86         | C87         | C82         | 122.8(8)       |

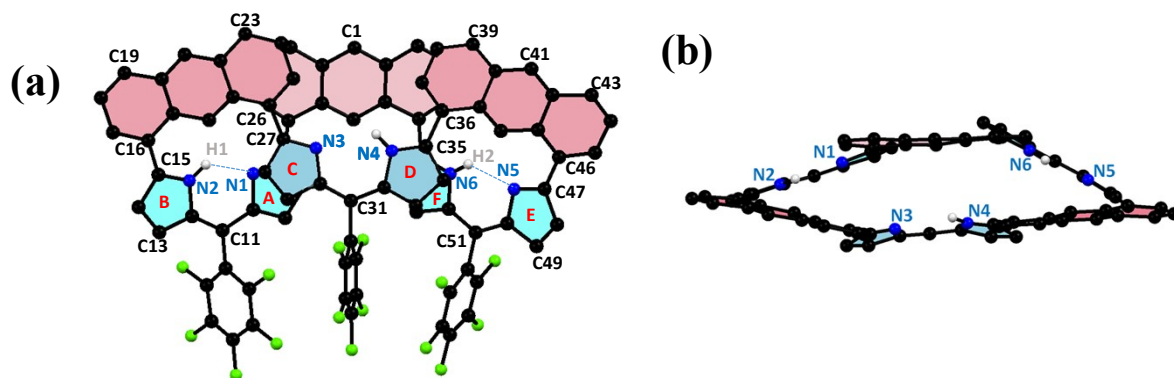

**Fig. S12** DFT optimized structures of compound **3** (a) Top view (b) Side view. Hydrogens and *meso*-aryl groups in side view are omitted for clarity.

**Figure S13:** Cartesian coordinates of the  $S_0$  optimized structures of the compound **3**.

# Sum of imaginary frequencies = 0;

# Total Free Energy (hartree) with = -5164.7977.

| <b>Atom</b> | <b>X</b>     | <b>Y</b>     | <b>Z</b>     |
|-------------|--------------|--------------|--------------|
| F           | -6.318645000 | 3.669459000  | 2.393510000  |
| F           | 0.789452000  | 1.818495000  | -0.447613000 |
| F           | -2.579079000 | 2.875639000  | -0.415089000 |
| F           | -0.873876000 | 1.914390000  | -4.888890000 |
| F           | -6.020474000 | 6.327177000  | 2.025111000  |
| F           | 6.055908000  | 3.433765000  | 2.700993000  |
| F           | 0.837306000  | 4.505617000  | -0.409292000 |
| N           | -3.718193000 | -0.331463000 | 2.203840000  |
| F           | 0.015115000  | 5.925422000  | -2.595231000 |
| N           | 3.681824000  | -0.363117000 | 2.033157000  |
| H           | 4.373016000  | -0.988120000 | 1.609141000  |
| F           | -3.999159000 | 7.275641000  | 0.456412000  |
| N           | -5.906843000 | -0.296498000 | 0.634625000  |
| H           | -5.237663000 | -0.875494000 | 1.152438000  |
| F           | -0.829588000 | 4.610696000  | -4.835452000 |
| N           | -1.471485000 | -1.740552000 | -2.568519000 |
| F           | -2.277641000 | 5.536261000  | -0.752847000 |
| N           | 1.293110000  | -1.756892000 | -2.463508000 |
| H           | 0.461119000  | -2.330655000 | -2.320864000 |
| F           | 5.932448000  | 6.114141000  | 2.362510000  |
| F           | 3.371804000  | 2.835803000  | -1.156628000 |
| N           | 5.874431000  | -0.544991000 | 0.475895000  |
| C           | 2.631033000  | -0.653682000 | 2.847256000  |
| C           | -1.235216000 | -3.883548000 | 4.461397000  |
| C           | -2.712691000 | -0.623201000 | 3.017281000  |
| C           | -1.256114000 | -2.583219000 | 3.829267000  |
| C           | 2.487611000  | -1.993420000 | 3.426837000  |
| C           | 3.714354000  | 0.982119000  | 1.728773000  |
| C           | 1.212298000  | -3.887086000 | 4.400998000  |
| C           | -5.379753000 | -2.737129000 | -1.278032000 |
| H           | -4.988706000 | -1.742597000 | -1.130601000 |
| C           | -3.314277000 | -3.349900000 | -2.561142000 |
| C           | -1.954620000 | 0.571608000  | 3.365524000  |
| H           | -1.133471000 | 0.617509000  | 4.065649000  |
| F           | 4.521835000  | 7.167567000  | 0.279075000  |



| <b>Atom</b> | <b>X</b>     | <b>Y</b>     | <b>Z</b>     |
|-------------|--------------|--------------|--------------|
| C           | -2.545586000 | -1.981492000 | 3.557995000  |
| C           | -3.662240000 | 1.043717000  | 1.979377000  |
| C           | 2.609788000  | 1.568799000  | 2.380009000  |
| H           | 2.348543000  | 2.616528000  | 2.351820000  |
| C           | -0.031054000 | -1.995037000 | 3.470106000  |
| H           | -0.044225000 | -1.069212000 | 2.911286000  |
| C           | -2.460359000 | -4.548636000 | 4.766267000  |
| H           | -2.416295000 | -5.523723000 | 5.243689000  |
| C           | 4.765288000  | 1.565995000  | 0.968514000  |
| C           | -3.697146000 | -2.689817000 | 3.852605000  |
| H           | -4.653046000 | -2.221407000 | 3.646868000  |
| C           | 1.940604000  | 0.557168000  | 3.070490000  |
| H           | 1.086326000  | 0.680563000  | 3.715865000  |
| C           | 1.207502000  | -2.589473000 | 3.761137000  |
| C           | -3.661553000 | -3.972160000 | 4.452242000  |
| H           | -4.593775000 | -4.481077000 | 4.677580000  |
| C           | -4.606357000 | 1.709270000  | 1.211402000  |
| C           | -5.725133000 | 1.072659000  | 0.595096000  |
| C           | -7.655284000 | 0.539508000  | -0.465354000 |
| H           | -8.571861000 | 0.587333000  | -1.035329000 |
| C           | -5.090706000 | -5.028376000 | -2.070795000 |
| C           | -4.597298000 | -3.672930000 | -1.967231000 |
| C           | -0.005095000 | -4.490692000 | 4.727847000  |
| H           | 0.005519000  | -5.476973000 | 5.185594000  |
| C           | -8.787387000 | -2.380707000 | 0.213967000  |
| H           | -9.424449000 | -1.624532000 | 0.662243000  |
| C           | -7.058243000 | -0.644710000 | -0.000381000 |
| C           | -2.548053000 | 1.611410000  | 2.712892000  |
| H           | -2.276881000 | 2.657159000  | 2.756258000  |
| C           | 3.635322000  | -3.980019000 | 4.299986000  |
| H           | 4.576091000  | -4.485515000 | 4.494019000  |
| F           | 3.241098000  | 5.511445000  | -1.479692000 |
| C           | -7.505950000 | -2.038011000 | -0.164374000 |
| C           | -0.093224000 | 0.278060000  | -2.655083000 |
| C           | -7.167764000 | -4.374680000 | -0.942451000 |
| C           | -1.326994000 | -0.355147000 | -2.650306000 |
| C           | -2.778770000 | -1.978438000 | -2.602833000 |
| C           | 2.446632000  | -4.555109000 | 4.657326000  |
| H           | 2.419455000  | -5.529186000 | 5.137743000  |

| <b>Atom</b> | <b>X</b>      | <b>Y</b>     | <b>Z</b>     |
|-------------|---------------|--------------|--------------|
| C           | 3.649562000   | -2.699934000 | 3.695412000  |
| H           | 4.609255000   | -2.242567000 | 3.478282000  |
| C           | 5.823179000   | 0.849230000  | 0.425355000  |
| C           | -3.538013000  | -0.740265000 | -2.742499000 |
| H           | -4.607606000  | -0.652992000 | -2.863080000 |
| C           | -6.356852000  | -5.336132000 | -1.556673000 |
| H           | -6.728621000  | -6.353642000 | -1.652702000 |
| C           | 0.388383000   | 2.476757000  | -1.541963000 |
| C           | -4.457123000  | 3.181188000  | 1.008384000  |
| C           | -6.654392000  | -3.035900000 | -0.777917000 |
| C           | -8.489697000  | -4.677262000 | -0.494090000 |
| H           | -8.860605000  | -5.691495000 | -0.614836000 |
| C           | -2.627807000  | 0.272522000  | -2.747865000 |
| H           | -2.822758000  | 1.332701000  | -2.817818000 |
| C           | 2.608225000   | -2.122127000 | -2.510300000 |
| C           | 3.039336000   | -3.518419000 | -2.407657000 |
| C           | -6.822093000  | 1.605973000  | -0.109202000 |
| H           | -6.977656000  | 2.651257000  | -0.332966000 |
| C           | 6.483173000   | -3.288876000 | -0.821711000 |
| C           | -9.280102000  | -3.704200000 | 0.056835000  |
| H           | -10.288719000 | -3.936288000 | 0.384884000  |
| C           | 1.161483000   | -0.393302000 | -2.633495000 |
| C           | -0.049195000  | 1.770402000  | -2.667434000 |
| C           | -3.047608000  | -5.699921000 | -3.198547000 |
| H           | -2.433648000  | -6.459867000 | -3.672828000 |
| C           | 5.192586000   | -2.953812000 | -1.254740000 |
| H           | 4.853540000   | -1.942271000 | -1.098947000 |
| C           | -2.574758000  | -4.365172000 | -3.139077000 |
| H           | -1.620832000  | -4.112027000 | -3.588573000 |
| C           | 3.350878000   | -0.946021000 | -2.744292000 |
| H           | 4.417901000   | -0.897879000 | -2.891345000 |
| C           | 4.756941000   | -5.260653000 | -1.931414000 |
| C           | -5.322369000  | 4.100749000  | 1.609497000  |
| C           | 4.717082000   | 3.049429000  | 0.783901000  |
| C           | 5.360385000   | 3.921370000  | 1.666044000  |
| C           | -5.179760000  | 5.474724000  | 1.429730000  |
| C           | -3.434991000  | 3.701398000  | 0.207153000  |
| C           | 7.408985000   | -2.306253000 | -0.295310000 |
| C           | 7.015506000   | -0.899106000 | -0.099009000 |

| <b>Atom</b> | <b>X</b>     | <b>Y</b>     | <b>Z</b>     |
|-------------|--------------|--------------|--------------|
| C           | 2.458756000  | 0.122843000  | -2.810222000 |
| H           | 2.703981000  | 1.159498000  | -2.983593000 |
| C           | 0.413744000  | 3.866176000  | -1.509065000 |
| C           | -0.434327000 | 3.918124000  | -3.760101000 |
| C           | -0.451911000 | 2.525284000  | -3.773293000 |
| C           | 0.002760000  | 4.591598000  | -2.622144000 |
| C           | -4.279495000 | -6.023772000 | -2.693497000 |
| H           | -4.659905000 | -7.039398000 | -2.760380000 |
| C           | 6.932462000  | -4.651686000 | -0.977629000 |
| C           | 8.704267000  | -2.689286000 | -0.009135000 |
| H           | 9.402819000  | -1.948546000 | 0.368744000  |
| C           | 6.042070000  | -5.602324000 | -1.492488000 |
| H           | 6.364645000  | -6.638043000 | -1.569651000 |
| C           | -4.147044000 | 5.961266000  | 0.631620000  |
| C           | 4.335239000  | -3.879901000 | -1.860776000 |
| C           | 7.013898000  | 1.356103000  | -0.224309000 |
| H           | 7.244465000  | 2.396097000  | -0.411030000 |
| C           | 5.304058000  | 5.303960000  | 1.503622000  |
| C           | 7.774508000  | 0.263196000  | -0.532285000 |
| H           | 8.730856000  | 0.240505000  | -1.037448000 |
| C           | 8.270296000  | -4.993703000 | -0.613461000 |
| H           | 8.593340000  | -6.025382000 | -0.723838000 |
| C           | 9.134523000  | -4.034572000 | -0.155610000 |
| H           | 10.155317000 | -4.296228000 | 0.106384000  |
| C           | -3.270092000 | 5.070851000  | 0.017022000  |
| C           | 2.214553000  | -4.521484000 | -2.886290000 |
| H           | 1.255031000  | -4.259929000 | -3.322008000 |
| C           | 4.007078000  | 3.621929000  | -0.273268000 |
| C           | 4.583466000  | 5.844034000  | 0.440393000  |
| C           | 2.612816000  | -5.882242000 | -2.888196000 |
| H           | 1.931032000  | -6.631653000 | -3.278628000 |
| C           | 3.857609000  | -6.243177000 | -2.444945000 |
| H           | 4.181363000  | -7.279766000 | -2.479414000 |
| C           | 3.932697000  | 4.999744000  | -0.455495000 |

**TLC Images, R<sub>f</sub> value and eluent used :**

The R<sub>f</sub> value is 0.80 and the solvent used is petroleum ether/CH<sub>2</sub>Cl<sub>2</sub> (85:15).

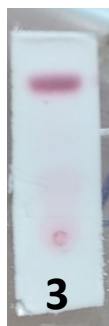

**References:**

1. M. J. Frisch, G. W. Trucks, H. B. Schlegel, G. E. Scuseria, M. A. Robb, J. R. Cheeseman, G. Scalmani, V. Barone, B. Mennucci, G. A. Petersson, et al. Gaussian 09 C.01; Gaussian Inc.: Wallingford CT, 2009.
2. O. Treutler and R. Ahlrichs, *J. Chem. Phys.* 1995, **102**, 346-354.
3. (a) A. D Becke, *J. Chem. Phys.* **1993**, **98**, 1372-1377. (b) W. J. Hehre, *Acc. Chem. Res.* 1976, **9**, 399-406.
4. J. Tomasi, B. Mennucci and R. Cammi, *Chem. Rev.* 2005, **105**, 2999-3093.
5. (a) G. M. Sheldrick, *Acta Crystallogr., Sect. A: Found. Crystallogr.* 2008, **A64**, 112-122. (b) *Program for Crystal Structure Solution and Refinement*; University of Göttingen: Germany, 1997. (c) G. M. Sheldrick, *Acta Crystallogr., Sect. C: Struct. Chem.* 2015, **71**, 3-8.
